# Supplementary material
Source: ML conference proceedings conference paper supplement (https://openreview.net/forum?id=lsQCDXjOl3k)
Supplement: supplementary_material [file attachment]

## A SAMPLES

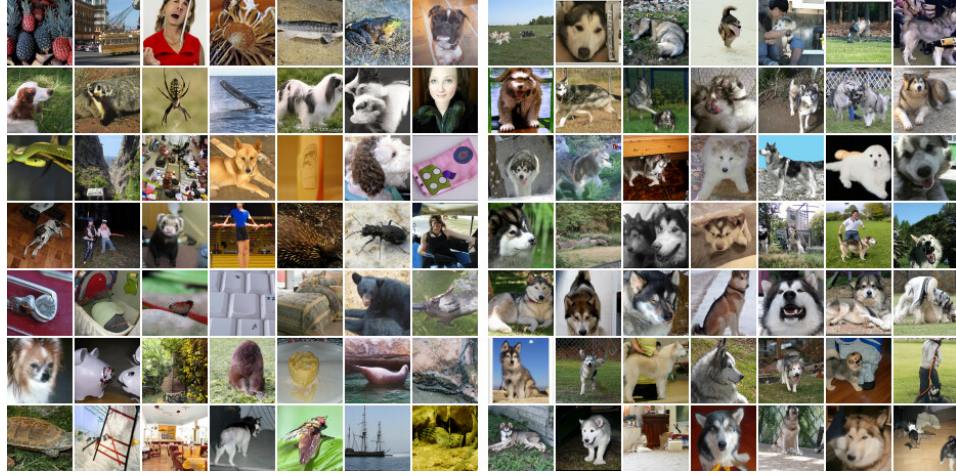

(a) Non-guided conditional sampling: FID=1.80, IS=53.71

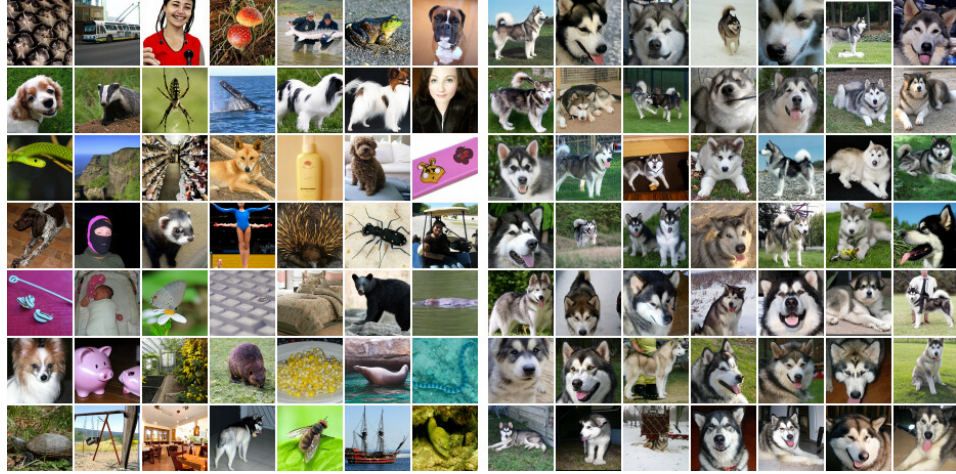(b) Unconditional guidance with  $w = 1.0$ : FID=12.6, IS=170.1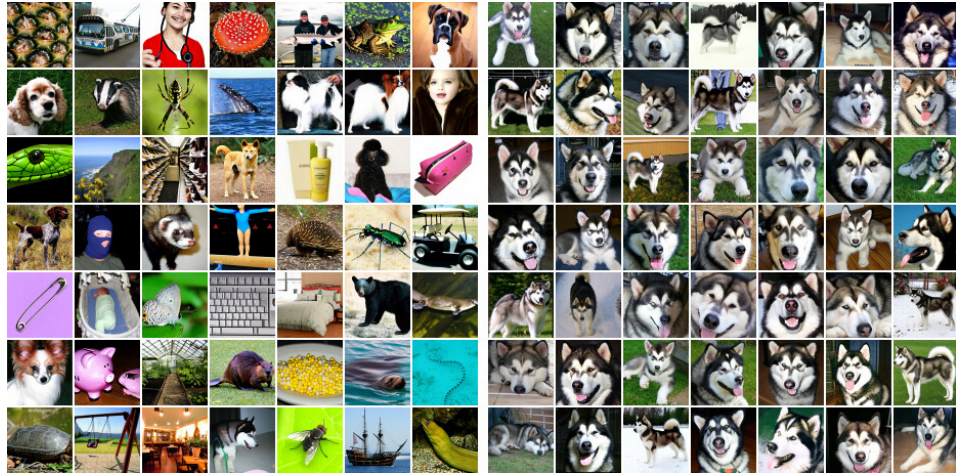(c) Unconditional guidance with  $w = 3.0$ : FID=24.83, IS=250.4

Figure 6: Unconditional guidance on ImageNet 64x64. Left: random classes. Right: single class (malamute). The same random seed was used for sampling in each subfigure.







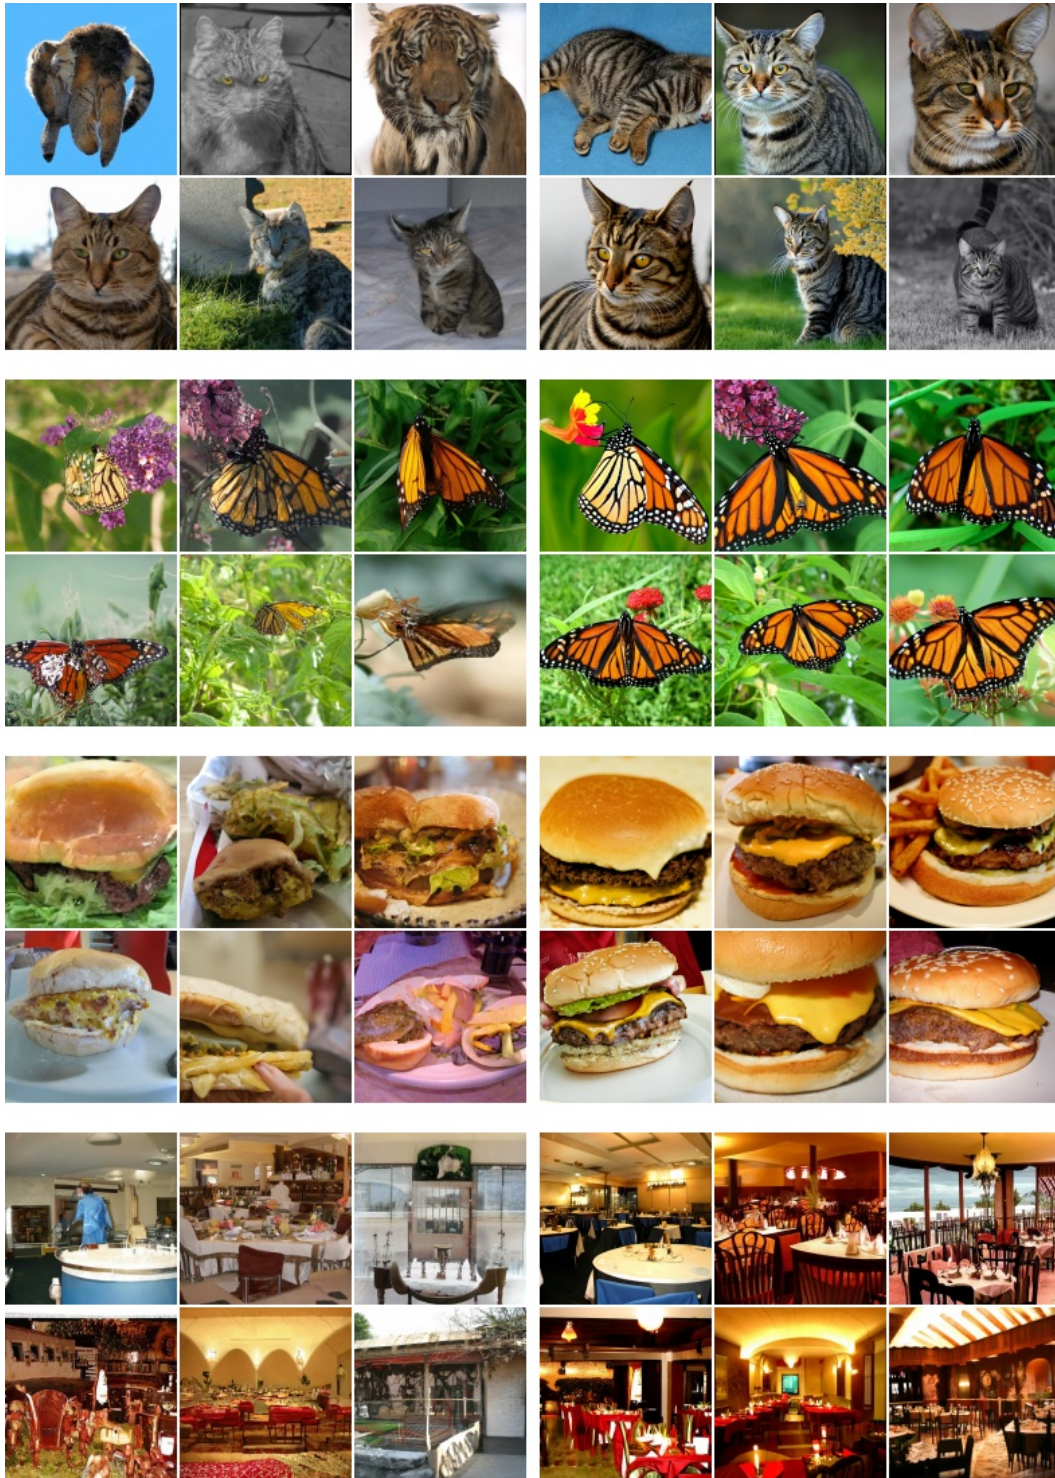

Figure 8: More examples of unconditional guidance on 128x128 ImageNet. Left: non-guided samples, right: unconditional-guided samples with  $w = 3.0$ .
